# Supplementary material for: Time Trends of Percutaneous Injuries in Hospital Nurses: Evidence of the Interference between Effects of Adoption of Safety Devices and Organizational Factors
Source: MDPI journal article supplement (doi:10.3390/ijerph18084371), 2021-04-20
Supplement: s1 [file s1]

**Time trends of percutaneous injuries in hospital nurses: evidence of the interference between effects of adoption of safety devices and organizational factors.**

Marco M. Ferrario<sup>1,2</sup>, MD; Giovanni Veronesi<sup>1</sup>, PhD; Rossana Borchini<sup>3</sup>, MD; Marco Cavicchiolo<sup>4</sup>, MD; Oriana Dashi<sup>4</sup>, MD; Daniela Dalla Gasperina<sup>1</sup>, MD; Giovanna Martinelli<sup>5</sup>; and Francesco Gianfagna<sup>1,6</sup>, MD.

<sup>1</sup> Department of Medicine and Surgery, School of Medicine, University of Insubria, Varese, Italy

<sup>2</sup> Occupational, Preventive and Toxicology Unit, ASST Sette Laghi, Varese, Italy

<sup>3</sup> Occupational and Preventive Medicine Unit, ASST Lariana, Como, Italy

<sup>4</sup> School of Specialization in Occupational Medicine, University of Insubria, Varese, Italy

<sup>5</sup> Quality Health Assessment Unit, ASST Sette Laghi, Varese, Italy

<sup>6</sup> Mediterranea Cardiocentro, Napoli, Italy

**Supplementary Tables**

**Table S1:** Number of percutaneous injuries, by injury agent and year, in the overall sample of Health Care Workers (left) and further divided by job title (nurses and nurse assistants).

| Year | All HCW               |         |      |                             |      | Nurses                |         |      |                             |      | Nurse assistants      |         |       |                             |      |
|------|-----------------------|---------|------|-----------------------------|------|-----------------------|---------|------|-----------------------------|------|-----------------------|---------|-------|-----------------------------|------|
|      | Percutaneous injuries | Needles |      | Scalpels/other sharp device |      | Percutaneous injuries | Needles |      | Scalpels/other sharp device |      | Percutaneous injuries | Needles |       | Scalpels/other sharp device |      |
|      |                       | n       | %^   | n                           | %^   |                       | n       | %^   | n                           | %^   |                       | n       | %^    | n                           | %^   |
| 2007 | 76                    | 74      | 97.4 | 2                           | 2.6  | 63                    | 62      | 98.4 | 1                           | 1.6  | 13                    | 12      | 92.3  | 1                           | 7.7  |
| 2008 | 74                    | 72      | 97.3 | 2                           | 2.7  | 65                    | 64      | 98.5 | 1                           | 1.5  | 9                     | 8       | 88.9  | 1                           | 11.1 |
| 2009 | 72                    | 69      | 95.8 | 3                           | 4.2  | 56                    | 53      | 94.6 | 3                           | 5.4  | 16                    | 16      | 100.0 | 0                           | 0.0  |
| 2010 | 60                    | 56      | 93.3 | 4                           | 6.7  | 48                    | 44      | 91.7 | 4                           | 8.3  | 12                    | 12      | 100.0 | 0                           | 0.0  |
| 2011 | 43                    | 37      | 86.0 | 6                           | 14.0 | 31                    | 29      | 93.5 | 2                           | 6.5  | 12                    | 8       | 66.7  | 4                           | 33.3 |
| 2012 | 34                    | 33      | 97.1 | 1                           | 2.9  | 23                    | 22      | 95.7 | 1                           | 4.3  | 11                    | 11      | 100.0 | 0                           | 0.0  |
| 2013 | 46                    | 42      | 91.3 | 4                           | 8.7  | 44                    | 40      | 90.9 | 4                           | 9.1  | 2                     | 2       | 100.0 | 0                           | 0.0  |
| 2014 | 48                    | 46      | 95.8 | 2                           | 4.2  | 42                    | 41      | 97.6 | 1                           | 2.4  | 6                     | 5       | 83.3  | 1                           | 16.7 |
| 2015 | 41                    | 37      | 90.2 | 4                           | 9.8  | 36                    | 32      | 88.9 | 4                           | 11.1 | 5                     | 5       | 100.0 | 0                           | 0.0  |
| 2016 | 41                    | 36      | 87.8 | 5                           | 12.2 | 36                    | 31      | 86.1 | 5                           | 13.9 | 5                     | 5       | 100.0 | 0                           | 0.0  |

^: % on the total number of percutaneous injuries, by year.

**Table S2:** Number of injuries, full time equivalent (FTE), observed injury rates per 100 FTE (with 95%CI) and predicted injury rates<sup>^</sup> for percutaneous injuries, per year, in nurses, by shift schedule

| Year | Day shift only |       |          |       |      |                | Day/evening shift |       |          |       |      |                | Day/evening/night shift |       |          |       |      |                |
|------|----------------|-------|----------|-------|------|----------------|-------------------|-------|----------|-------|------|----------------|-------------------------|-------|----------|-------|------|----------------|
|      | Inj. No.       | FTE   | Observed |       |      | Predicted rate | Inj. No.          | FTE   | Observed |       |      | Predicted rate | Inj. No.                | FTE   | Observed |       |      | Predicted rate |
|      |                |       | rate     | 95%CI |      |                |                   |       | rate     | 95%CI |      |                |                         |       | rate     | 95%CI |      |                |
| 2007 | 8              | 112.3 | 7.1      | 2.2   | 12.1 | 7.2            | 11                | 131.6 | 8.4      | 3.4   | 13.3 | 8.7            | 44                      | 587.4 | 7.5      | 5.3   | 9.7  | 8.4            |
| 2008 | 4              | 108.7 | 3.7      | 0.1   | 7.3  | 6.1            | 10                | 129.4 | 7.7      | 2.9   | 12.5 | 7.6            | 51                      | 617.2 | 8.3      | 6.0   | 10.5 | 7.0            |
| 2009 | 9              | 118.4 | 7.6      | 2.6   | 12.6 | 5.2            | 11                | 129.1 | 8.5      | 3.5   | 13.6 | 6.7            | 36                      | 639.5 | 5.6      | 3.8   | 7.5  | 5.8            |
| 2010 | 4              | 119.5 | 3.3      | 0.1   | 6.6  | 4.4            | 12                | 140.5 | 8.5      | 3.7   | 13.4 | 5.8            | 32                      | 636.0 | 5.0      | 3.3   | 6.8  | 4.8            |
| 2011 | 6              | 123.3 | 4.9      | 1.0   | 8.8  | 3.8            | 2                 | 126.5 | 1.6      | 0.0   | 3.8  | 5.1            | 23                      | 646.8 | 3.6      | 2.1   | 5.0  | 4.0            |
| 2012 | 5              | 118.9 | 4.2      | 0.5   | 7.9  | 3.2            | 3                 | 128.8 | 2.3      | 0.0   | 5.0  | 4.5            | 15                      | 648.1 | 2.3      | 1.1   | 3.5  | 3.4            |
| 2013 | 2              | 112.1 | 1.8      | 0.0   | 4.3  | 2.7            | 7                 | 123.3 | 5.7      | 1.5   | 9.9  | 3.9            | 35                      | 622.6 | 5.6      | 3.8   | 7.5  | 3.8            |
| 2014 | 4              | 116.1 | 3.4      | 0.1   | 6.8  | 2.3            | 5                 | 126.1 | 4.0      | 0.5   | 7.4  | 3.5            | 33                      | 650.1 | 5.1      | 3.3   | 6.8  | 4.3            |
| 2015 | 2              | 116.9 | 1.7      | 0.0   | 4.1  | 2.0            | 2                 | 127.9 | 1.6      | 0.0   | 3.7  | 3.0            | 32                      | 657.3 | 4.9      | 3.2   | 6.6  | 4.8            |
| 2016 | 1              | 104.4 | 1.0      | 0.0   | 2.8  | 1.7            | 5                 | 126.6 | 4.0      | 0.5   | 7.4  | 2.7            | 30                      | 667.8 | 4.5      | 2.9   | 6.1  | 5.5            |

FTE: Full-Time Equivalent, computed considering 36 hrs/week and from the total amount of working hours during the year 2016.

<sup>^</sup>: predicted injury rates: from joinpoint regression model, with a turning point at 2012 for nurses in day/evening/night shift.
